# Supplementary material for: Diagnostic Accuracy of Blood-Based Biomarker Panels: A Systematic Review
Source: PubMed Central journal article supplement (PMC8963375; doi:10.3389/fnagi.2022.683689), 2022-03-11
Supplement: Table_1.pdf [file Table_1.pdf]

## Supplementary Material

Supplementary Table 1. A detailed summary of study characteristics included in the systematic review

| <i>Study</i>                | <i>Study Design</i>                     | <i>Cohort(s)</i> | <i>Sample size</i>                                                                      | <i>Tissue</i> | <i>Proposed blood biomarker(s)</i>                   | <i>Analytical technique</i>                | <i>Statistics</i>                                                                                                     | <i>Type of biomarker(s)</i>    |
|-----------------------------|-----------------------------------------|------------------|-----------------------------------------------------------------------------------------|---------------|------------------------------------------------------|--------------------------------------------|-----------------------------------------------------------------------------------------------------------------------|--------------------------------|
| McGuinness et al., 2015 (1) | Longitudinal study (2-year follow-up)   |                  | N = 182<br>MCI (97), CN (85)                                                            | Platelet      | BACE1                                                | BMG Labtech FLUOstar OPTIMA                | AUC=0.64 (p=0.04)                                                                                                     | Prognostic                     |
| Burnham et al., 2016 (2)    | Longitudinal study (54-month follow-up) | AIBL             | N = 817<br>CN (585), MCI (74), AD (158)<br>Validation group: CN (227), MCI (11), AD (5) | Plasma        | A $\beta$ 42 + CXCL13 + IgM-1 + IL-17 + PPY + VCAM-1 | Luminex human discovery 151MAP pane        | Sn=80%; Sp=82%<br>Validation cohort: Sn=79%; Sp=76%                                                                   | Diagnostic                     |
| Janelidze et al., 2016 (3)  | CC                                      | BioFINDER        | N = 719<br>CN (274), SCD (174), MCI (214), AD (57)                                      | Plasma        | A $\beta$ 40, A $\beta$ 42                           | Simoa platform                             | A $\beta$ 42: AUC (CSF) = 0.655, AUC (PET) = 0.604<br>A $\beta$ 42/A $\beta$ 40 ratio: AUC = 0.683, AUC (PET) = 0.621 | Diagnostic                     |
| Jammeh et al., 2016 (4)     | CC                                      | ADNI             | N = 157<br>AD (106), CN (51)                                                            | Plasma        | A1M + A2M + C3 + AAT + APOE + PPP                    | -                                          | AUC=0.85, Sn=85.4%, Sp=78.6%, accuracy = 83.6%                                                                        | Diagnostic                     |
| Yu et al., 2016 (5)         | CC                                      |                  | N = 90<br>AD (50), CN (40)                                                              | Serum         | VEGF + sCD40L                                        | Immunomagnetic beads assay                 | AUC=0.58 (95% CI: 0.775-0.941)                                                                                        | Diagnostic                     |
| Zheng et al., 2016 (6)      | Longitudinal study (2-years follow-up)  |                  | N = 254<br>CN (90), MCI-AD (76), MCI-MCI (88)                                           | Serum         | HCY + BDNF + APOE $\epsilon$ 4                       | ELISA and microparticle-enzyme-immunoassay | Sn=85.0%, Sp=86.0%, PPV=0.93, NPV=0.73%                                                                               | Predictive for early diagnosis |
| An et al., 2017 (7)         | CC                                      |                  | N = 171<br>AD (24), CN (29)                                                             | Plasma        | A $\beta$ oligomers                                  | Multimer detection system                  | Sn=83.3%, Sp=90.0%                                                                                                    | Diagnostic                     |

|                              |                                                  |      |                                                                                             |        |                                                                 |                                                                                                             |                                                                                           |                                       |
|------------------------------|--------------------------------------------------|------|---------------------------------------------------------------------------------------------|--------|-----------------------------------------------------------------|-------------------------------------------------------------------------------------------------------------|-------------------------------------------------------------------------------------------|---------------------------------------|
| Goudey et al., 2017 (8)      |                                                  | ADNI | N = 566<br>Training: MCI (198), AD (102), CN (58)<br>Validation: MCI (198), AD (10)         | Plasma | A $\beta$ 42 + APOE + CgA + EOT3 + APOE $\epsilon$ 4 status     | -                                                                                                           | AUC=0.84, Sn=78%, Sp=0.73%                                                                | Predictive of CSF A $\beta$ 42 status |
| Janel et al., 2017 (9)       | CC                                               |      | N = 140<br>Cohort (M): CN (20), AD (69)<br>Cohort (P): CN (25), AD (26)                     | Plasma | DYRK1A + BDNF + HCY                                             | Solid-phase immobilized epitope-immunoassay, ELISA, and fluorimetric high-performance liquid chromatography | AUC=0.933; Sn=95.2%; Sp=88.9%                                                             | Diagnostic                            |
| Mattsson et al., 2017 (10)   | Longitudinal study (6.5-years follow up)         | ADNI | N = 570<br>CN (193), MCI (197), AD (180)                                                    | Plasma | NFL                                                             | Ultrasensitive single-molecule array (Simoa) platform                                                       | AUC=0.87                                                                                  | Diagnostic and prognostic             |
| Mohd Hasni et al., 2017 (11) | CC                                               |      | N = 78<br>AD (39), CN (39)                                                                  | Serum  | IL-13 + CXCL10                                                  | Procarta Multiplex Cytokine and ELISA assay                                                                 | AUC=1 (95% CI); Sp=100%; Sn=100%                                                          | Diagnostic                            |
| Pedriani et al., 2017 (12)   | Longitudinal study (18- and 54-months follow-up) | AIBL | N = 665<br>18 months: CN (559), MCI (39), AD (67)<br>54 months: CN (528), MCI (51), AD (86) | Plasma | IL-10 + IL-12/23p40                                             | Multiplex assay panel                                                                                       | 18 months: AUC=0.802<br>54 months: AUC=0.805                                              | Early diagnosis                       |
| Popp et al., 2017 (13)       | CC                                               |      | N = 120<br>CN (48), MCI (72)                                                                | Serum  | bFGF + CRP + IL-16 + sFLT-1 + sICAM-1 + Tie-2 + VEGF-C + VEGF-D | V-Plex Neuroinflammation Panel 1                                                                            | AUC=0.89 (0.81 - 0.95)                                                                    | Classification for AD pathology       |
| Tateno et al., 2017 (14)     | CC                                               |      | N = 117<br>ApoE4 (28), non-ApoE4 (89)                                                       | Plasma | A $\beta$ 42/A $\beta$ 40 + APOE $\epsilon$ 4                   | Sandwich ELISA assay                                                                                        | APOE $\epsilon$ 4 (+): AUC=0.519, Sn=63.6%, Sp=52.9%<br>APOE $\epsilon$ 4 (-): AUC=0.648, | Diagnostic                            |

|                            |                    |                   |                                               |        |                                                           |                              |                                                                                                                                         |                                       |
|----------------------------|--------------------|-------------------|-----------------------------------------------|--------|-----------------------------------------------------------|------------------------------|-----------------------------------------------------------------------------------------------------------------------------------------|---------------------------------------|
|                            |                    |                   |                                               |        |                                                           |                              | Sn=92.9%, Sp=45.9%,<br>PPV=44.1%,<br>NPV=93.3%                                                                                          |                                       |
| Wang et al., 2017 (15)     | CC                 |                   | N = 61<br>AD (24), CN (37)                    | Plasma | A $\beta$ oligomers                                       | Multimer detection system    | AUC=0.844,<br>Sn=78.3%, Sp=86.5%                                                                                                        | Diagnostic                            |
| Yu et al., 2017 (16)       | CC                 |                   | N = 312<br>AD (156), CN (156)                 | Serum  | IL-13 + IL-1 $\alpha$ + CXCL10 + IL-3 + TNF $\alpha$      | Immunomagnetic beads assay   | AUC=0.58 (95% CI: 0.775-0.941)                                                                                                          | Diagnostic                            |
| Chen et al., 2018 (17)     | CC                 |                   | N = 126<br>AD (96), CN (30)                   | Serum  | APP + NCAM + A $\beta$ 40 + A $\beta$ 42                  | ELISA assay                  | AUC=0.997, Sn=98.5                                                                                                                      | Diagnostic and prognostic             |
| Cheng et al., 2018 (18)    | CC                 |                   | N = 199<br>AD (98), CN (101)                  | Plasma | BDNF + AGT + IGFBP-2 + OPN + cathepsin D + SAP + C4 + TTR | Luminex xMAP                 | AUC= 0.958,<br>Sn=86.7%, Sp=88.1%,<br>Accuracy=87.4%                                                                                    | Diagnostic                            |
| de Rojas et al., 2018 (19) | CC                 | FACEHBI           | N = 200                                       | Plasma | A $\beta$ 42/A $\beta$ 40                                 | Sandwich ELISA assay         | AUC=0.681, Sn=83%,<br>Sp=59.1%                                                                                                          | Predictive of amyloid PET             |
| Eke et al., 2018 (20)      | CC                 | ADNI              | N = 166<br>AD (108), CN (58)                  | Plasma | A1M + A2M + C3 + IgM + TNC                                | -                            | AUC=0.89, Sn=86.5%,<br>Sp=82.1%,<br>Accuracy=85%                                                                                        | Diagnostic                            |
| Lewczuk et al., 2018 (21)  | CC                 |                   | N = 140<br>MCI (25), AD (33),<br>CN (41)      | Plasma | NFL                                                       | Simoa assay                  | Age (-): AUC=0.853,<br>Sn=84%, Sp=0.78%,<br>accuracy=82%<br>Age (50-80):<br>AUC=0.920, Sn=61%-<br>91%, Sp=89%- 20%,<br>accuracy=84%-80% | Diagnostic (nonspecific)              |
| Mielke et al., 2018 (22)   | CC                 | MCSA, ADRC        | N = 269<br>CN (172), MCI (57),<br>AD (40)     | Plasma | p-tau181, p-tau181 + APOE $\epsilon$ 4+                   | MSD                          | AUC (p-tau181) = 0.803<br>AUC (p-tau181 + APOE $\epsilon$ 4+) = 0.860                                                                   | Predictor of elevated brain A $\beta$ |
| Nabers et al., 2018 (23)   | Longitudinal study | BioFINDER, ESTHER | N = 385<br>BioFINDER:<br>PET+ (36), PET- (37) | Plasma | A $\beta$ secondary structure                             | Vertex 70V FTIR-spectrometer | AUC (BioFINDER) = 0.78, Sn = 69%, Sp = 86%                                                                                              | Diagnostic                            |

|                            |                                                |                                               |                                                |          |                                                             |                                                         |                                                                                                          |                           |
|----------------------------|------------------------------------------------|-----------------------------------------------|------------------------------------------------|----------|-------------------------------------------------------------|---------------------------------------------------------|----------------------------------------------------------------------------------------------------------|---------------------------|
|                            |                                                |                                               | ESTHER:<br>AD (65), CN (247)                   |          |                                                             |                                                         | AUC (ESTHER) =<br>0.80, Sn = 71%, Sp =<br>91%                                                            |                           |
| Nakamura et al., 2018 (24) | CC                                             | NCGG, AIBL                                    | NCGG = 121, AIBL = 252                         | Plasma   | A $\beta$ 42 + APP/A $\beta$ 42 + A $\beta$ 42/A $\beta$ 40 | Immunoprecipitation coupled with mass spectrometry      | Discovery: AUC=0.967<br>Validation: AUC=0.941<br>Accuracy=90%                                            | Predictive of amyloid PET |
| Shen et al., 2018 (25)     | Longitudinal study (3-years follow-up)         |                                               | N = 224<br>Probable AD (75), MCI (96), ND (53) | Plasma   | BACE1                                                       | Synthetic fluorescence substrate ELISA and Western blot | Sn = 84%, Sp = 88%                                                                                       | Prognostic                |
| Verberk et al., 2018 (26)  | Longitudinal study (3 $\pm$ 2 years follow-up) | SCIENCE project and Amsterdam Dementia Cohort | N = 248                                        | Plasma   | A $\beta$ 42/A $\beta$ 40 + APOE $\epsilon$ 4 status        | Simoa Human Neurology 3-Plex A assay kit                | AUC=0.83 (95% CI 0.77-0.89), Sn=76%, Sp=75%                                                              | Prescreener, diagnostic   |
| Winston et al., 2018 (27)  | CC                                             |                                               | N = 137<br>CN (76), MCI (61)                   | Exosomes | A $\beta$ 42, NRG1, SYP, SYT, and SYNPO                     | ELISA assay                                             | A $\beta$ 42: Sn=80.6%<br>NRG1, SYP, SYT, and SYNPO: Sn=100%                                             | Diagnostic                |
| Agliardi et al., 2019 (28) | CC                                             |                                               | N = 42<br>AD (24), CN (17)                     | Exosomes | SNAP-25                                                     | Western Blot and ELISA                                  | AUC=0.82, Sn=87.5%, Sp=70.6%                                                                             | Diagnostic                |
| Baldacci et al., 2019 (29) | CC                                             |                                               | N = 78<br>Early AD (39), CN (39)               | RBC      | $\alpha$ -syn/A $\beta$ , $\alpha$ -syn/tau                 | Immunoassays                                            | AUC ( $\alpha$ -syn/A $\beta$ ) = 0.76<br>AUC ( $\alpha$ -syn/tau) = 0.72                                | Diagnostic                |
| Boccardi et al., 2019 (30) | CC                                             |                                               | N = 289<br>HC (87), MCI (73), AD (129)         | Plasma   | IFN $\alpha$ -2, IL-1, TNF $\alpha$                         |                                                         | AUC = 0.6524                                                                                             | Prognosis                 |
| Bram et al., 2019 (31)     | CC                                             |                                               | N = 40<br>AD (20), CN (20)                     | Platelet | ADAM10 + BACE1 + PSEN1                                      | Western blot                                            | AUC (ADAM10) = 0.9,<br>Sn = 88.90%, Sp =<br>78.90%<br>AUC (PSEN1) = 0.80,<br>Sn = 77.80%, Sp =<br>83.30% | Diagnostic                |

|                                   |                                        |                 |                                                                                                                |          |                                                                            |                                                         |                                                                                                                                                 |                                                                              |
|-----------------------------------|----------------------------------------|-----------------|----------------------------------------------------------------------------------------------------------------|----------|----------------------------------------------------------------------------|---------------------------------------------------------|-------------------------------------------------------------------------------------------------------------------------------------------------|------------------------------------------------------------------------------|
|                                   |                                        |                 |                                                                                                                |          |                                                                            |                                                         | AUC (ADAM10 + BACE1 + PSEN1) = 0.9                                                                                                              |                                                                              |
| Chatterjee et al., 2019 (32)      | CC                                     | KARVIA H        | N = 95<br>SMC (72), CN (23)                                                                                    | Plasma   | A $\beta$ 42/A $\beta$ 40 + APOE $\epsilon$ 4 status                       | Ultrasensitive Simoa assay                              | AUC=0.78                                                                                                                                        | Predictive of amyloid PET                                                    |
| Chen et al., 2019 (33)            | CC                                     | HABS, UCL, UCSD | N = 151<br>Discovery cohort:<br>CN (19), MCI (21), AD (25)<br>Validation cohort:<br>CN (41), MCI (22), AD (23) | Plasma   | Tau                                                                        | ELISA and Simoa assay                                   | Discovery cohort:<br>MCI vs. Con:<br>AUC=0.79<br>AD vs. Con: AUC=0.75<br>Validation cohort:<br>MCI vs. Con:<br>AUC=0.88<br>AD vs. Con: AUC=0.96 | Diagnostic                                                                   |
| Guzmán-Martínez et al., 2019 (34) | CC                                     | FACEHB I        | N = 51<br>AD (36), CN (15)                                                                                     | Platelet | Alz-tau@ (HMW/LMW tau ratio)                                               | SDS-PAGE and Western Blot                               | AUC=0.756,<br>Sn=71.43%,<br>Sp=69.23%                                                                                                           | Diagnostic                                                                   |
| Han et al., 2019 (35)             | CC                                     | KBASE           | N = 407<br>CN (241), MCI (103), AD (63)                                                                        | Plasma   | AChE                                                                       | ELISA and colorimetric assay                            | AChE + ApoE $\epsilon$ 4:<br>AUC=0.728-0.798<br>AChE activity + ApoE $\epsilon$ 4:<br>AUC=0.727-0.768                                           | Predictor of cerebral A $\beta$ deposition in cognitively normal individuals |
| Iulita et al., 2019 (36)          | Longitudinal study (3 years follow-up) | LEAD            | N = 107<br>pAD (28), MCI (30), SMI (30), CN (19)                                                               | Plasma   | A $\beta$ 40 + A $\beta$ 42 + MMP-1 + MMP-3 + IL-8 + IL-10 + TNF- $\alpha$ | Multi-Spot V-PLEX                                       | pAD: AUC=0.732<br>MoCA decline: AUC=0.751<br>CAMCOG decline: AUC= 0.844                                                                         | Diagnosis, prognosis                                                         |
| Jia et al., 2019 (37)             | CC                                     |                 | N = 298<br>Discovery stage:<br>AD (28), aMCI (25), CN (29)                                                     | Exosomes | A $\beta$ 42 + T-tau + P-T181-tau                                          | Neuronal-derived exosomes immunoprecipitation and ELISA | Discovery cohort:<br>AUC=0.86-0.97<br>Validation cohort:<br>AUC=0.85-0.98                                                                       | Predictive of CFS Ab42, T-tau, and P-T181-tau status                         |

|                               |                                        |              |                                                                                      |        |                                                                                                              | Validation stage:<br>AD (73), aMCI (71),<br>CN (72)                    |                                                                                                                                                                                                                                                                                  |                |  |
|-------------------------------|----------------------------------------|--------------|--------------------------------------------------------------------------------------|--------|--------------------------------------------------------------------------------------------------------------|------------------------------------------------------------------------|----------------------------------------------------------------------------------------------------------------------------------------------------------------------------------------------------------------------------------------------------------------------------------|----------------|--|
| Kapogiannis et al., 2019 (38) | Longitudinal study (2 years follow-up) | BLSA, JHADRC | N = 414<br>BLSA cohort: MCI to AD (128), CN (222)<br>JHADRC cohort: AD (35), CN (29) | nEV    | nEV concentration + nEV mean diameter + nEV proteins (Ttau, p-tau181, p-tau231, pY-IRS-1, and pSer312-IRS-1) | Neuronal-enriched extracellular vesicles immunoprecipitation and ELISA | BLSA cohort:<br>Training set (n=161):<br>AUC=0.896,<br>Sn=81.8%, Sp=85.8%<br><br>Validation set (n=80):<br>AUC=0.80, Sn=55.6%,<br>Sp=88.7%<br><br>JHADRC cohort:<br>Training set:<br>AUC=0.989,<br>Sn=100%,<br>Sp=94.7%<br><br>Validation set:<br>AUC=0.767,<br>Sn=91.7%, Sp=60% | Diagnostic     |  |
| Li et al., 2019 (39)          | CC                                     |              | N = 84<br>AD (53), MCI (22),<br>CN (9)                                               | Plasma | A $\beta$ 42, A $\beta$ 40, T-tau                                                                            | Simoa assay                                                            | A $\beta$ 42/A $\beta$ 40:<br>AUC=0.77, Sn=82%,<br>Sp=64%                                                                                                                                                                                                                        | Diagnostic     |  |
| Liu et al., 2019 (40)         | CC                                     | Liu et al.   | N = 63<br>CN (10), EMCI (26), LMCI (23), AD (4)                                      | Serum  | apoA-I + aC3/nC3 + TTR                                                                                       | Turbidimetric immunoassay and ELISA assay                              | AUC (apoA-I) = 0.77<br>AUC (aC3/nC3) = 0.79<br>AUC = 0.89, Sn=83%,<br>Sp= 90%                                                                                                                                                                                                    | MCI prognosis  |  |
| Liu et al., 2019 (41)         | Longitudinal study (2-year follow-up)  |              | N = 92                                                                               | Serum  | ACT                                                                                                          | ELISA and Western blot                                                 | AUC (6 months) = 0.688<br>AUC (12 months) = 0.839<br>AUC (24 months) = 0.887                                                                                                                                                                                                     | aMCI diagnosis |  |
| Meng et al., 2019 (42)        | CC                                     |              | N = 58<br>AD (30), CN (28)                                                           | Plasma | A $\beta$ oligomers                                                                                          | Multimer detection system                                              | AUC=0.89, Sn=82.1%,<br>Sp=90.0%                                                                                                                                                                                                                                                  | Diagnostic     |  |

|                                  |    |                                                       |                                                                                                                         |        |                                                                                                                       |                                                                                       |                                                                                                                                               |                                  |
|----------------------------------|----|-------------------------------------------------------|-------------------------------------------------------------------------------------------------------------------------|--------|-----------------------------------------------------------------------------------------------------------------------|---------------------------------------------------------------------------------------|-----------------------------------------------------------------------------------------------------------------------------------------------|----------------------------------|
| Morgan et al., 2019 (43)         | CC | AddNeuroMed, EMIF-AD MBD, DCR                         | N = 1580<br>Discovery cohort:<br>CN (259), MCI (199), AD (262)<br>Replication cohorts:<br>AD (193), MCI (494), CN (600) | Plasma | FB + FH + sCR1, MCP1 + EOT1<br>sCR1 + MCP1 + EOT1<br>FB + FH + age                                                    | Singleplex and multiplex assay, ELISA and V-plex electrochemiluminescence immunoassay | AD vs. Con: AUC (discovery/replication cohort) =0.74/0.81<br>AD vs. MCI: AUC (discovery/replication cohort) =0.74/0.67<br>MCI to AD: AUC=0.71 | Diagnostic and prognostic        |
| Nabers et al., 2019 (44)         | CC | BioFINDER, ESTHER                                     | N = 100<br>CN (61), AD (39)                                                                                             | Plasma | A $\beta$ secondary structure                                                                                         | Spectrometry                                                                          | BioFINDER: AUC=0.78, Sn=69%, Sp=86%<br>ESTHER: AUC=0.80, Sn=71%, Sp=91%                                                                       | Diagnostic                       |
| Palmqvist et al., 2019 (45)      | CC | BioFINDER and a German biomarker study for validation | N = 1079<br>CU, MCI, AD                                                                                                 | Plasma | Ab42/Ab40, APOE+4 status, tau, NF-L                                                                                   | Elecsys immunoassays (Roche Diagnostics)                                              | Cohort 1: 0.80–0.87;<br>Cohort 2: 0.86                                                                                                        | Predictive of CSF Ab status      |
| Park et al., 2019 (46)           | CC |                                                       | N = 76<br>CN (52), MCI (9), AD (15)                                                                                     | Plasma | T-tau/A $\beta$ 42                                                                                                    | Simoa assay and xMAP technology                                                       | AUC=0.89, Sn=80%, Sp=91.43%                                                                                                                   | Predictive of tau pathology      |
| Park et al., 2019 (47)           | CC | KBASE                                                 | N = 254<br>CN (107), MCI (107), AD (40)                                                                                 | Plasma | Set I: LGALS3BP + ACE + gal-3<br>Set II: POSTN + ACE + VE-cadherin<br>Proposed biomarkers: LGALS3BP, CDH5, ACE, POSTN | Mass spectrometry and ELISA                                                           | Set I: AUC (PiB- vs. PiB+) =0.871, Sn=79%, Sp=84%<br>Set II: AUC (for MCI) = 0.836, Sn=68%, Sp=90%                                            | Predictive of Ab deposition      |
| Pérez-Grijalba et al., 2019 (48) | CC | AB255 study                                           | N = 59<br>CN (39), MCI (20)                                                                                             | Plasma | A $\beta$ 42/A $\beta$ 40                                                                                             | ABtest kit                                                                            | AUC=0.881, Sn=77.8%, Sp=87.5%, PPV=0.732, NPV=0.900                                                                                           | Predictive of Ab PET, diagnostic |
| Perrotte et al., 2019 (49)       | CC |                                                       | N = 95                                                                                                                  | Plasma | ApoJ, Klotho, protein carbonyls, circulating-proteosome                                                               | Immunoblotting, ELISA                                                                 | MCI vs. Con: AUC (ApoJ) = 0.8804                                                                                                              | Diagnostic and prognostic        |

|                             |    |                                    |                                                                                                                                  |        |                                                            |                                           |                                                                                                                                                                                                                                                                                                                   |            |
|-----------------------------|----|------------------------------------|----------------------------------------------------------------------------------------------------------------------------------|--------|------------------------------------------------------------|-------------------------------------------|-------------------------------------------------------------------------------------------------------------------------------------------------------------------------------------------------------------------------------------------------------------------------------------------------------------------|------------|
|                             |    |                                    | CN (24), MCI (24),<br>AD (47)                                                                                                    |        |                                                            |                                           | AUC (Klotho) = 0.8036<br><i>AD vs. Con:</i><br>AUC (ApoJ) = 0.8168<br>AUC (Klotho) = 0.7976<br>AUC (protein<br>carbonyls) = 0.7528<br>AUC (circulating-<br>proteosome activity) =<br>0.8440<br><i>MCI vs. AD:</i><br>AUC (protein<br>carbonyls) = 0.7522<br>AUC (circulating-<br>proteosome activity) =<br>0.8379 |            |
| Schindler et al., 2019 (50) | CC |                                    | N = 158                                                                                                                          | Plasma | A $\beta$ 42/A $\beta$ 40 +<br>APOE $\epsilon$ 4 status    | Immunoprecipitation,<br>Mass spectrometry | AUC=0.94 (95% CI<br>0.90–0.97)                                                                                                                                                                                                                                                                                    | Diagnostic |
| Schipke et al., 2019 (51)   | CC |                                    | N = 160<br>CN (79), AD (81)                                                                                                      | Serum  | BDNF + IGF-1 +<br>VEGF + TGF- $\beta$ 1 +<br>MCP-1 + IL-18 | ELISA assays                              | AUC=0.94, Sn=76%,<br>Sp=95%,<br>Accuracy=85%                                                                                                                                                                                                                                                                      | Diagnostic |
| Whelan et al., 2019 (52)    | CC | BioFINDER                          | N = 843<br>Control A $\beta$ - (415),<br>Control A $\beta$ + (142),<br>MCI- A $\beta$ - (50), MCI-<br>A $\beta$ + (75), AD (161) | Plasma | OSM, MMP9, HAGH,<br>CD200, AXIN1, uPA                      | Olink™ ProSeek<br>immunoassay             | <i>AD vs. Con:</i><br>AUC=0.94<br><i>Prodromal AD vs. Con:</i><br>AUC=0.78                                                                                                                                                                                                                                        | Diagnostic |
| Yao et al., 2019 (53)       | CC |                                    | N = 123<br>AD (54), CN (69)                                                                                                      | Serum  | GSN, BDNF, TIMP1,<br>VLDLR, APLP2                          | ELISA and Western<br>blot for validation  | AUC (VLDLR) = 0.932<br>AUC (TIMP1) = 0.903                                                                                                                                                                                                                                                                        | Diagnostic |
| Abate et al., 2020 (54)     | CC | InveCe.Ab,<br>PharmaCog/E-<br>ADNI | InveCe.Ab: N = 264<br>PharmaCog/E-<br>ADNI: N = 111                                                                              | Plasma | Unfolded p53                                               | -                                         | AUC = 0.92                                                                                                                                                                                                                                                                                                        | Predictive |



|                              |                                          |            |                                                             |        |                                                         |                               |                                                                                                                                           |                        |
|------------------------------|------------------------------------------|------------|-------------------------------------------------------------|--------|---------------------------------------------------------|-------------------------------|-------------------------------------------------------------------------------------------------------------------------------------------|------------------------|
| Abe et al., 2020 (55)        | Multicenter, CC                          | Abe et al. | N = 259<br>CN (100), MCI (60), and AD (99)                  | Serum  | FBC + AHSG + FAC + PPC11                                | BLOTCHIP® - MS analysis       | MCI vs. Con:<br>AUC=0.662, Sn=72%, Sp=59%<br><br>MCI vs. AD:<br>AUC=0.672, Sn=77%, Sp=62%<br><br>AD vs. Con:<br>AUC=0.804, Sn=87%, Sp=65% | Diagnostic             |
| Barthélemy et al., 2020 (56) | CC                                       | SILK       | Discovery cohort = 58<br>Validation cohort = 92             | Plasma | p-tau-217, p-tau-181                                    | Immunopurification (IP)-LC-MS | p-tau-217:<br>AUC (discovery) = 0.99<br>AUC (validation) = 0.92<br><br>p-tau-181:<br>AUC (discovery) = 0.98<br>AUC (validation) = 0.75    |                        |
| Doecke et al., 2020 (57)     | Longitudinal study (54 months follow-up) | AIBL       | Month 18: n = 176<br>Month 36: n = 169<br>Month 54: n = 135 | Plasma | Aβ42/Aβ40 + APOEε4                                      | ELISA assays                  | AUC=0.88-0.913<br>AUC(HC)=0.808-0.898                                                                                                     | Diagnostic             |
| Eke et al., 2020 (58)        | CC                                       | ADNI       | N = 358<br>CN (58), MCI (198), AD (102)                     | Plasma | Aβ42 + CgA + EOT3 + APOEε4                              | -                             | AUC=0.84, Sn=0.82, Sp=0.62, PPV=0.81, NPV=0.64                                                                                            | Predictive of CSF Aβ42 |
| Ellegaard et al., 2020 (59)  | CC                                       |            | N = 30<br>AD (10), MCI (10), CN (10)                        | Plasma | CLEC1B/CCL11 ratio in EVs<br>TGFα/CCL20 ratio in plasma | Proximity extension assay     | AUC (CLEC1B/CCL11) = 0.95, 95% CI = 0.86-1, p = 0.001<br>AUC (TGFα/CCL20) = 0.96, 95% CI = 0.88-1, p = 0.001                              | Diagnostic             |

|                             |    |                                                                                                                       |                                                                                    |                  |                                        |                                                  |                                                                                                                                                                 |                       |
|-----------------------------|----|-----------------------------------------------------------------------------------------------------------------------|------------------------------------------------------------------------------------|------------------|----------------------------------------|--------------------------------------------------|-----------------------------------------------------------------------------------------------------------------------------------------------------------------|-----------------------|
| Feinkohl et al., 2020 (60)  | CC |                                                                                                                       | N = 93<br>AD (44), CN (49)                                                         | Plasma           | A $\beta$ 42/A $\beta$ 40              | ELISA assays                                     | AUC=0.59, Sn=61.2%,<br>Sp=63.6%                                                                                                                                 | Diagnostic            |
| Gao et al., 2020 (61)       | CC |                                                                                                                       | N = 30<br>CN (10), MCI (10),<br>AD (10)                                            | Plasma,<br>Serum | A $\beta$ 42/A $\beta$ 40              | Nanosheet-based<br>sensor system                 | <i>aMCI vs. Con:</i><br>AUC=0.83, Sn=70%,<br>Sp=70%<br><i>AD vs. Con:</i><br>AUC=0.91, Sn=90%,<br>90%<br><i>aMCI vs. AD:</i><br><br>AUC=0.75, Sn=80%,<br>Sp=60% | Diagnostic            |
| Janelidze et al., 2020 (62) | CC | BioFINDER, Arizona Study of Aging and Neurodegenerative Disorders /Brain and Body Donation Program                    | Cohort 1: 182<br>Cohort 2: 344<br>Cohort 3: 63                                     | Plasma           | A $\beta$ 42/A $\beta$ 40 +<br>pTau181 | MSD, Elecsys fully-automated immunoassays, Simoa | AUC=0.84 (95% CI = 0.79-0.89)                                                                                                                                   | Diagnostic            |
| Karikari et al., 2020 (63)  | CC | TRIAD, BioFINDER-2, primary care cohort referred from primary care physicians of the Canadian National Health Service | N=1131<br>TRIAD cohort: 226<br>BioFINDER-2 cohort: 763<br>Primary care cohort: 105 | Plasma           | p-tau181                               | Ultrasensitive blood immunoassay                 | AUC = 85.3%; 95% CI 81.4–89.2%                                                                                                                                  | Diagnostic, prognosis |

|                             |                                       |                                                                                                          |                                      |                 |                                 |                               |                                                                                                                                                                                                          |                       |
|-----------------------------|---------------------------------------|----------------------------------------------------------------------------------------------------------|--------------------------------------|-----------------|---------------------------------|-------------------------------|----------------------------------------------------------------------------------------------------------------------------------------------------------------------------------------------------------|-----------------------|
|                             |                                       | for specialist care.                                                                                     |                                      |                 |                                 |                               |                                                                                                                                                                                                          |                       |
| Palmqvist et al., 2020 (64) | CC                                    | Arizona-based neuropathology cohort, Swedish BioFINDER-2 cohort, Colombian autosomal-dominant AD kindred | N = 1402                             | Plasma          | p-tau217                        | Immunoassay                   | AUC = 0.89 and 0.96                                                                                                                                                                                      | Diagnostic            |
| Perrotte et al., 2020 (65)  | CC                                    | Recruited from the Memory Clinic of Sherbrooke                                                           | N = 60                               | Plasma exosomes | p-tau181/t-tau ratio            | Luminex assay                 | Control from AD [AUC of 0.823 (p < 0.05)<br>MCI from AD: AUC of 0.87 (p < 0.05)                                                                                                                          | Diagnostic, prognosis |
| Nam et al., 2020 (66)       | Longitudinal study (4-year follow up) |                                                                                                          | N = 76<br>CN (26), MCI (30), AD (20) | Serum, Exosomes | T-tau, p-Tau202, p-tau202/T-tau | ELISA assays and Western blot | <i>Serum:</i><br>AUC (T-tau) = 0.675<br>AUC (p-tau202) = 0.5958<br>AUC (p-tau202/T-tau) = 0.5253<br><i>Exosomes:</i><br>AUC (T-tau) = 0.6434<br>AUC (p-tau202) = 0.7333<br>AUC (p-tau202/T-tau) = 0.6113 | Prognostic            |

|                                     |                                        |                                               |                                                 |          |                                                               |                                                      |                                                                                                                                                                                 |                                                         |
|-------------------------------------|----------------------------------------|-----------------------------------------------|-------------------------------------------------|----------|---------------------------------------------------------------|------------------------------------------------------|---------------------------------------------------------------------------------------------------------------------------------------------------------------------------------|---------------------------------------------------------|
| Sheu et al., 2020 (67)              | CC                                     |                                               | N = 86<br>AD (32), CN (54)                      | Serum    | AHI1                                                          | Western blot and ELISA assays                        | AUC=0.7-0.82                                                                                                                                                                    | Diagnostic                                              |
| Stockmann et al., 2020 (68)         | Longitudinal study (6 years follow-up) | SCIENCE project and Amsterdam Dementia Cohort | N = 203                                         | Plasma   | A $\beta$ misfolding + A $\beta$ 42/A $\beta$ 40 <sup>a</sup> | Immuno-infrared-sensor technology and SIMOA          | AUC (A $\beta$ misfolding) = 0.94 (95% CI, 0.86-1.00; 6-year follow-up)<br>AUC (A $\beta$ 42/A $\beta$ 40) = 0.92 (95% CI, 0.82-1.00)<br>AUC (panel) = 0.99 (95% CI, 0.99-1.00) | Prognostic                                              |
| Teuber-Hanselmann et al., 2020 (69) | Multi-centre trans-sectional           | Teuber-Hanselmann                             | N = 237<br>MCI (21), mild-AD (98), CN (118)     | Serum    | KLK8                                                          | ELISA assay                                          | AUC(MCI)=0.94, Sn = 52.4%, Sp = 99.2%<br>AUC(AD)=0.83, Sn = 56.1%, Sp = 69.8%                                                                                                   | Diagnostic                                              |
| Verberk et al., 2020 (70)           | CC                                     |                                               | N = 252<br>SCD, MCI, AD                         | Plasma   | Ab42/Ab40, GFAP, NF-L                                         |                                                      | Total (AUC): 0.88 (Sn = 0.82, Sp = 0.86)<br>Nondemented (AUC): 0.84 (Sn = 0.70, Sp = 0.86)                                                                                      | Prediction of amyloid PET status and disease monitoring |
| Wang et al., 2020 (71)              | Pilot study, CC                        | Wang et al.                                   | N = 30<br>MCI (10), AD (10), CN (10)            | Plasma   | AMPK $\alpha$ 1                                               | ELISA assay                                          | AUC = 0.8 (MCI), 0.74 (AD), 0.77 (MCI + AD)<br>Sn = 88.89% (MCI), 77.78% (AD), 83.33% (MCI + AD)<br>Sp = 70% (MCI, AD)                                                          | Diagnostic                                              |
| Westwood et al., 2020 (72)          | CC                                     | EMIF-AD catalogue                             | N = 1866<br>HC, MCI, AD                         | Plasma   | FCN2, CFI, C4, B2M, Cathepsin D, APOE+4, A1AT                 | Luminex xMAP, ELISA, and Meso Scale Discovery assays | AUC = 0.742, Sn = 0.682, Sp = 0.704                                                                                                                                             | Diagnostic                                              |
| Youn et al., 2020 (73)              | CC                                     |                                               | N = 104<br>AD (52), CN (52)                     | Plasma   | A $\beta$ oligomers                                           | Multimer detection system                            | Sn=100%, Sp=92.31%                                                                                                                                                              | Diagnostic                                              |
| Jia et al., 2020 (74)               | Two-stage-sectional study,             |                                               | N = 739<br>Discovery stage: AD (28), aMCI (25), | Exosomes | GAP43 + Ng + SNAP-25                                          | ELISA assays                                         | AUC=0.87-0.89                                                                                                                                                                   | Predictive                                              |

---

|                    |                                                                                                                                                |
|--------------------|------------------------------------------------------------------------------------------------------------------------------------------------|
| longitudinal study | CN (29); Validation stage: AD (73), aMCI (71), CN (72)<br>preclinical AD (160), CN (160)<br>mutation carriers (59), non-mutation carriers (62) |
|--------------------|------------------------------------------------------------------------------------------------------------------------------------------------|

---

<sup>a</sup>Age, gender, and the presence of APOE $\epsilon$ 4 allele were included as covariates

## References:

1. McGuinness B, Fuchs M, Barrett SL, Passmore AP, Johnston JA. Platelet Membrane  $\beta$ -Secretase Activity in Mild Cognitive Impairment and Conversion to Dementia: a Longitudinal Study. *J Alzheimers Dis* (2015) **49**:1095–1103. doi:10.3233/JAD-150795
2. Burnham SC, Rowe CC, Baker D, Bush AI, Doecker JD, Faux NG, Laws SM, Martins RN, Maruff P, Macaulay SL, et al. Predicting Alzheimer disease from a blood-based biomarker profile. *Neurology* (2016) **87**:1093–1101. doi:10.1212/WNL.0000000000003094
3. Janelidze S, Stomrud E, Palmqvist S, Zetterberg H, Van Westen D, Jeromin A, Song L, Hanlon D, Tan Hehir CA, Baker D, et al. Plasma  $\beta$ -amyloid in Alzheimer's disease and vascular disease. *Sci Rep* (2016) **6**: doi:10.1038/srep26801
4. Jammeh E, Zhao P, Carroll C, Pearson S, Ifeachor E. Identification of blood biomarkers for use in point of care diagnosis tool for Alzheimer's disease - IEEE Conference Publication. *2016 38th Annu Int Conf IEEE Eng Med Biol Soc* (2016) **2016**:2415–2418. doi:10.1109/EMBC.2016.7591217
5. Yu S, Liu YPY-HY-PH, Liu YPY-HY-PH, Jiao S-SS, Liu L, Wang Y-JJ, Fu W-LL. Diagnostic utility of VEGF and soluble CD40L levels in serum of Alzheimer's patients. *Clin Chim Acta* (2016) **453**:154–159. doi:10.1016/j.cca.2015.12.018
6. Zheng L, Kong X, Cui Y, Wei Y, Zhang J, Wei W. Conversion from MCI to AD in patients with the APOE  $\epsilon$ 4 genotype: Prediction by plasma HCY and serum BDNF. *Neurosci Lett* (2016) **626**:19–24. doi:10.1016/j.neulet.2016.05.018
7. An SSA, Lee BS, Yu JS, Lim K, Kim GJ, Lee R, Kim S, Kang S, Park YH, Wang MJ, et al. Dynamic changes of oligomeric amyloid  $\beta$  levels in plasma induced by spiked synthetic A $\beta$ 42. *Alzheimer's Res Ther* (2017) **9**:1–10. doi:10.1186/S13195-017-0310-6/FIGURES/4
8. Goudey B, Fung BJ, Schieber C, Faux NG. A blood-based signature of cerebrospinal fluid A $\beta$ 1–42 status. *bioRxiv* (2017) doi:10.1101/190207
9. Janel N, Alexopoulos P, Badel A, Lamari F, Camproux AC, Lagarde J, Simon S, Feraudet-Tarisse C, Lamourette P, Arbones M, et al. Combined assessment of DYRK1A, BDNF and homocysteine levels as diagnostic marker for Alzheimer's disease. *Transl Psychiatry* (2017) **7**:e11154–e11154. doi:10.1038/tp.2017.123
10. Mattsson N, Andreasson U, Zetterberg H, Blennow K, Weiner MW, Aisen P, Toga AW, Petersen R, Jack CR, Jagust W, et al. Association of plasma neurofilament light with neurodegeneration in patients with Alzheimer disease. *JAMA Neurol* (2017) **74**:557–566. doi:10.1001/jamaneurol.2016.6117
11. Mohd Hasni DS, Lim SM, Chin AV, Tan MP, Poi PJH, Kamaruzzaman SB, Majeed ABA, Ramasamy K. Peripheral cytokines, C-X-C motif ligand10 and interleukin-13, are associated with Malaysian Alzheimer's disease. *Geriatr Gerontol Int* (2017)

17:839–846. doi:10.1111/ggi.12783

12. Pedrini S, Gupta VB, Hone E, Doecke J, O'Bryant S, James I, Bush AI, Rowe CC, Villemagne VL, Ames D, et al. A blood-based biomarker panel indicates IL-10 and IL-12/23p40 are jointly associated as predictors of  $\beta$ -amyloid load in an AD cohort. *Sci Rep* (2017) **7**:14057. doi:10.1038/s41598-017-14020-9
13. Popp J, Oikonomidi A, Tautvydaitė D, Dayon L, Bacher M, Migliavacca E, Henry H, Kirkland R, Severin I, Wojcik J, et al. Markers of neuroinflammation associated with Alzheimer's disease pathology in older adults. *Brain Behav Immun* (2017) **62**:203–211. doi:10.1016/j.bbi.2017.01.020
14. Tateno A, Sakayori T, Kim WC, Koeda M, Kumita S, Suzuki H, Okubo Y. Effect of apolipoprotein E phenotype on the association of plasma amyloid  $\beta$  and amyloid positron emission tomography imaging in Japan. *Alzheimer's Dement Diagnosis, Assess Dis Monit* (2017) **9**:51–56. doi:10.1016/j.dadm.2017.08.002
15. Wang MJ, Yi S, Han J-Y, Park SY, Jang J-W, Chun IK, Kim SE, Lee BS, Kim GJ, Yu JS, et al. Oligomeric forms of amyloid- $\beta$  protein in plasma as a potential blood-based biomarker for Alzheimer's disease. *Alzheimers Res Ther* (2017) **9**:98. doi:10.1186/s13195-017-0324-0
16. Yu S, Liu Y-P, Liu H-L, Li J, Xiang Y, Liu Y-H, Jiao S-S, Liu L, Wang Y, Fu W. Serum Protein-Based Profiles as Novel Biomarkers for the Diagnosis of Alzheimer's Disease. *Mol Neurobiol* (2017) **55**:3999–4008. doi:10.1007/s12035-017-0609-0
17. Chen K, Gao T, Bai Z, Yuan Z. Circulating APP, NCAM and A $\beta$  serve as biomarkers for Alzheimer's disease. *Brain Res* (2018) **1699**:117–120. doi:10.1016/j.brainres.2018.08.015
18. Cheng Z, Yin J, Yuan H, Jin C, Zhang F, Wang Z, Liu X, Wu Y, Wang T, Xiao S. Blood-Derived Plasma Protein Biomarkers for Alzheimer's Disease in Han Chinese. *Front Aging Neurosci* (2018) **10**:414. doi:10.3389/fnagi.2018.00414
19. de Rojas I, Romero J, Rodríguez-Gomez O, Pesini P, Sanabria A, Pérez-Cordon A, Abdelnour C, Hernández I, Rosende-Roca M, Mauleón A, et al. Correlations between plasma and PET beta-amyloid levels in individuals with subjective cognitive decline: the Fundació ACE Healthy Brain Initiative (FACEHBI). *Alzheimers Res Ther* (2018) **10**:119. doi:10.1186/s13195-018-0444-1
20. Eke CS, Jammeh E, Li X, Carroll C, Pearson S, Ifeachor E. Identification of Optimum Panel of Blood-based Biomarkers for Alzheimer's Disease Diagnosis Using Machine Learning. in *2018 40th Annual International Conference of the IEEE Engineering in Medicine and Biology Society (EMBC)* (United States: IEEE), 3991–3994. doi:10.1109/EMBC.2018.8513293
21. Lewczuk P, Ermann N, Andreasson U, Schultheis C, Podhorna J, Spitzer P, Maler JM, Kornhuber J, Blennow K, Zetterberg H. Plasma neurofilament light as a potential biomarker of neurodegeneration in Alzheimer's disease. *Alzheimers Res Ther* (2018) **10**:71. doi:10.1186/s13195-018-0404-9
22. Mielke MM, Hagen CE, Xu J, Chai X, Vemuri P, Lowe VJ, Airey DC, Knopman DS, Roberts RO, Machulda MM, et al. Plasma phospho-tau181 increases with Alzheimer's disease clinical severity and is associated with tau- and amyloid-positron emission

tomography. *Alzheimer's Dement* (2018) **14**:989–997. doi:10.1016/j.jalz.2018.02.013

23. Nabers A, Perna L, Lange J, Mons U, Schartner J, Güldenhaupt J, Saum K-U, Janelidze S, Holleccek B, Rujescu D, et al. Amyloid blood biomarker detects Alzheimer's disease. *EMBO Mol Med* (2018) **10**: doi:10.15252/emmm.201708763
24. Nakamura A, Kaneko N, Villemagne VL, Kato T, Doecke J, Doré V, Fowler C, Li QX, Martins R, Rowe C, et al. High performance plasma amyloid- $\beta$  biomarkers for Alzheimer's disease. *Nature* (2018) **554**:249–254. doi:10.1038/nature25456
25. Shen Y, Wang H, Sun Q, Yao H, Keegan AP, Mullan M, Wilson J, Lista S, Leyhe T, Laske C, et al. Increased Plasma Beta-Secretase 1 May Predict Conversion to Alzheimer's Disease Dementia in Individuals With Mild Cognitive Impairment. *Biol Psychiatry* (2018) **83**:447–455. doi:10.1016/j.biopsych.2017.02.007
26. Verberk IMW, Slot RE, Verfaillie SCJ, Heijst H, Prins ND, van Berckel BNM, Scheltens P, Teunissen CE, van der Flier WM. Plasma Amyloid as Prescreener for the Earliest Alzheimer Pathological Changes. *Ann Neurol* (2018) **84**:648–658. doi:10.1002/ana.25334
27. Winston CN, Goetzl EJ, Baker LD, Vitiello M V., Rissman RA. Growth Hormone-Releasing Hormone Modulation of Neuronal Exosome Biomarkers in Mild Cognitive Impairment. *J Alzheimer's Dis* (2018) **66**:971–981. doi:10.3233/JAD-180302
28. Agliardi C, Guerini FR, Zanzottera M, Bianchi A, Nemni R, Clerici M. SNAP-25 in Serum Is Carried by Exosomes of Neuronal Origin and Is a Potential Biomarker of Alzheimer's Disease. *Mol Neurobiol* (2019) **56**:5792–5798. doi:10.1007/s12035-019-1501-x
29. Baldacci F, Daniele S, Piccarducci R, Giampietri L, Pietrobono D, Giorgi FS, Nicoletti V, Frosini D, Libertini P, Lo Gerfo A, et al. Potential Diagnostic Value of Red Blood Cells  $\alpha$ -Synuclein Heteroaggregates in Alzheimer's Disease. *Mol Neurobiol* (2019) **56**:6451–6459. doi:10.1007/s12035-019-1531-4
30. Boccardi V, Paolacci L, Remondini D, Giampieri E, Poli G, Curti N, Cecchetti R, Villa A, Ruggiero C, Brancorsini S, et al. Cognitive Decline and Alzheimer's Disease in Old Age: A Sex-Specific Cytokinome Signature. *J Alzheimer's Dis* (2019) **72**:911–918. doi:10.3233/JAD-190480
31. Bram JM de F, Talib LL, Joaquim HPG, Sarno TA, Gattaz WF, Forlenza OV. Protein levels of ADAM10, BACE1, and PSEN1 in platelets and leukocytes of Alzheimer's disease patients. *Eur Arch Psychiatry Clin Neurosci* (2019) **269**:963–972. doi:10.1007/s00406-018-0905-3
32. Chatterjee P, Elmi M, Goozee K, Shah T, Sohrabi HR, Dias CB, Pedrini S, Shen K, Asih PR, Dave P, et al. Ultrasensitive Detection of Plasma Amyloid- $\beta$  as a Biomarker for Cognitively Normal Elderly Individuals at Risk of Alzheimer's Disease. *J Alzheimer's Dis* (2019) **71**:775–783. doi:10.3233/JAD-190533
33. Chen Z, Mengel D, Keshavan A, Rissman RA, Billinton A, Perkinton M, Percival-Alwyn J, Schultz A, Properzi M, Johnson K, et al. Learnings about the complexity of extracellular tau aid development of a blood-based screen for Alzheimer's disease.



*Alzheimer's Dement* (2019) **15**:487–496. doi:10.1016/j.jalz.2018.09.010

34. Guzmán-Martínez L, Tapia JP, Farías GA, González A, Estrella M, MacCioni RB. The Alz-tau Biomarker for Alzheimer's Disease: Study in a Caucasian Population. *J Alzheimer's Dis* (2019) **67**:1181–1186. doi:10.3233/JAD-180637
35. Han S-HH, Park J-CC, Byun MS, Yi D, Lee JH, Lee DY, Mook-Jung I. Blood acetylcholinesterase level is a potential biomarker for the early detection of cerebral amyloid deposition in cognitively normal individuals. *Neurobiol Aging* (2019) **73**:21–29. doi:10.1016/j.neurobiolaging.2018.09.001
36. Iulita MF, Ganesh A, Pentz R, Flores Aguilar L, Gubert P, Ducatzenzeiler A, Christie S, Wilcock GK, Cuello AC. Identification and Preliminary Validation of a Plasma Profile Associated with Cognitive Decline in Dementia and At-Risk Individuals: A Retrospective Cohort Analysis. *J Alzheimer's Dis* (2019) **67**:327–341. doi:10.3233/JAD-180970
37. Jia L, Qiu Q, Zhang H, Chu L, Du Y, Zhang J, Zhou C, Liang F, Shi S, Wang S, et al. Concordance between the assessment of A $\beta$ 42, T-tau, and P-T181-tau in peripheral blood neuronal-derived exosomes and cerebrospinal fluid. *Alzheimers Dement* (2019) **15**:1071–1080. doi:10.1016/j.jalz.2019.05.002
38. Kapogiannis D, Mustapic M, Shardell MD, Berkowitz ST, Diehl TC, Spangler RD, Tran J, Lazaropoulos MP, Chawla S, Gulyani S, et al. Association of Extracellular Vesicle Biomarkers with Alzheimer Disease in the Baltimore Longitudinal Study of Aging. *JAMA Neurol* (2019) **76**:1340–1351. doi:10.1001/jamaneurol.2019.2462
39. Li W-WW, Shen Y-YY, Tian D-YY, Bu X-L Le, Zeng F, Liu Y-HH, Chen Y, Yao X-QQ, Li H-YY, Chen D-WW, et al. Brain Amyloid- $\beta$  deposition and blood biomarkers in patients with clinically diagnosed alzheimer's disease. *J Alzheimer's Dis* (2019) **69**:169–178. doi:10.3233/JAD-190056
40. Liu S, Suzuki H, Ito H, Korenaga T, Akatsu H, Meno K, Uchida K. Serum levels of proteins involved in amyloid- $\beta$  clearance are related to cognitive decline and neuroimaging changes in mild cognitive impairment. *Alzheimer's Dement Diagnosis, Assess Dis Monit* (2019) **11**:85–97. doi:10.1016/j.dadm.2018.11.003
41. Liu S, Pan J, Tang K, Lei Q, He L, Cai X, Li Z. Alpha 1-antichymotrypsin may be a biomarker for the progression of amnesic mild cognitive impairment. *Acta Neurol Belg* (2019) doi:10.1007/s13760-019-01206-3
42. Meng X, Li T, Wang X, Lv X, Sun Z, Zhang J, Su F, Kang S, Kim S, An SSA, et al. Association between increased levels of amyloid- $\beta$  oligomers in plasma and episodic memory loss in Alzheimer's disease. *Alzheimers Res Ther* (2019) **11**:89. doi:10.1186/s13195-019-0535-7
43. Morgan AR, Touchard S, Leckey C, O'Hagan C, Nevado-Holgado AJ, Barkhof F, Bertram L, Blin O, Bos I, Dobricic V, et al. Inflammatory biomarkers in Alzheimer's disease plasma. *Alzheimer's Dement* (2019) **15**:776–787. doi:10.1016/j.jalz.2019.03.007
44. Nabers A, Hafermann H, Wiltfang J, Gerwert K. A $\beta$  and tau structure-based biomarkers for a blood- and CSF-based two-step

recruitment strategy to identify patients with dementia due to Alzheimer's disease. *Alzheimer's Dement Diagnosis, Assess Dis Monit* (2019) **11**:257–263. doi:10.1016/j.dadm.2019.01.008

45. Palmqvist S, Janelidze S, Stomrud E, Zetterberg H, Karl J, Zink K, Bittner T, Mattsson N, Eichenlaub U, Blennow K, et al. Performance of Fully Automated Plasma Assays as Screening Tests for Alzheimer Disease–Related  $\beta$ -Amyloid Status. *JAMA Neurol* (2019) **76**:1060. doi:10.1001/jamaneurol.2019.1632
46. Park J-C, Han S-H, Yi D, Byun MS, Lee JH, Jang S, Ko K, Jeon SY, Lee Y-S, Kim YK, et al. Plasma tau/amyloid- $\beta$ 1–42 ratio predicts brain tau deposition and neurodegeneration in Alzheimer's disease. *Brain* (2019) **142**:771–786. doi:10.1093/brain/awy347
47. Park JC, Han SH, Lee H, Jeong H, Byun MS, Bae J, Kim H, Lee DY, Yi D, Shin SA, et al. Prognostic plasma protein panel for A $\beta$  deposition in the brain in Alzheimer's disease. *Prog Neurobiol* (2019) **183**:101690. doi:10.1016/j.pneurobio.2019.101690
48. Pérez-Grijalba V, Arbizu J, Romero J, Prieto E, Pesini P, Sarasa L, Guillen F, Monleón I, San-José I, Martínez-Lage P, et al. Plasma A $\beta$ 42/40 ratio alone or combined with FDG-PET can accurately predict amyloid-PET positivity: a cross-sectional analysis from the AB255 Study. *Alzheimers Res Ther* (2019) **11**:96. doi:10.1186/s13195-019-0549-1
49. Perrotte M, Le Page A, Fournet M, Le Sayec M, Rassart É, Fulop T, Ramassamy C. Blood-based redox-signature and their association to the cognitive scores in MCI and Alzheimer's disease patients. *Free Radic Biol Med* (2019) **130**:499–511. doi:10.1016/j.freeradbiomed.2018.10.452
50. Schindler SE, Bollinger JG, Ovod V, Mawuenyega KG, Li Y, Gordon BA, Holtzman DM, Morris JC, Benzinger TLS, Xiong C, et al. High-precision plasma  $\beta$ -amyloid 42/40 predicts current and future brain amyloidosis. *Neurology* (2019) **93**:E1647–E1659. doi:10.1212/WNL.0000000000008081
51. Schipke CG, Günter O, Weinert C, Scotton P, Sigle J-P, Kallarackal J, Kabelitz D, Finzen A, Feuerhelm-Heidl A. Definition and quantification of six immune- and neuroregulatory serum proteins in healthy and demented elderly. *Neurodegener Dis Manag* (2019) **9**:193–203. doi:10.2217/nmt-2019-0003
52. Whelan CD, Mattsson N, Nagle MW, Vijayaraghavan S, Hyde C, Janelidze S, Stomrud E, Lee J, Fitz L, Samad TA, et al. Multiplex proteomics identifies novel CSF and plasma biomarkers of early Alzheimer's disease. *Acta Neuropathol Commun* (2019) **7**:169. doi:10.1186/s40478-019-0795-2
53. Yao F, Zhang K, Zhang Y, Guo Y, Li A, Xiao S, Liu Q, Shen L, Ni J. Identification of blood biomarkers for Alzheimer's disease through computational prediction and experimental validation. *Front Neurol* (2019) **10**:1158. doi:10.3389/fneur.2018.01158
54. Abate G, Vezzoli M, Polito L, Guaita A, Albani D, Marizzoni M, Garrafa E, Marengoni A, Forloni G, Frisoni GB, et al. A conformation variant of p53 combined with machine learning identifies alzheimer disease in preclinical and prodromal stages. *J Pers Med* (2021) **11**:1–16. doi:10.3390/jpm11010014

55. Abe K, Shang J, Shi X, Yamashita T, Hishikawa N, Takemoto M, Morihara R, Nakano Y, Ohta Y, Deguchi K, et al. A New Serum Biomarker Set to Detect Mild Cognitive Impairment and Alzheimer's Disease by Peptidome Technology. *J Alzheimer's Dis* (2020) **73**:217–227. doi:10.3233/JAD-191016
56. Barthélemy NR, Horie K, Sato C, Bateman RJ. Blood plasma phosphorylated-tau isoforms track CNS change in Alzheimer's disease. *J Exp Med* (2020) **217**: doi:10.1084/jem.20200861
57. Doecke JD, Pérez-Grijalba V, Fandos N, Fowler C, Villemagne VL, Masters CL, Pesini P, Sarasa M. Total A $\beta$ 42/A $\beta$ 40 ratio in plasma predicts amyloid-PET status, independent of clinical AD diagnosis. *Neurology* (2020) **94**:E1580–E1591. doi:10.1212/WNL.00000000000009240
58. Eke CS, Sakr F, Jammeh E, Zhao P, Ifeachor E. A Robust Blood-based Signature of Cerebrospinal Fluid A $\beta$ (42) Status. *Annu Int Conf IEEE Eng Med Biol Soc IEEE Eng Med Biol Soc Annu Int Conf* (2020) **2020**:5523–5526. doi:10.1109/EMBC44109.2020.9175158
59. Ellegaard Nielsen J, Sofie Pedersen K, Vestergård K, Georgiana Maltesen R, Christiansen G, Lundbye-Christensen S, Moos T, Risom Kristensen S, Pedersen S. Novel Blood-Derived Extracellular Vesicle-Based Biomarkers in Alzheimer's Disease Identified by Proximity Extension Assay. *Biomedicines* (2020) **8**:199. doi:10.3390/biomedicines8070199
60. Feinkohl I, Schipke CG, Kruppa J, Menne F, Winterer G, Pischon T, Peters O. Plasma Amyloid Concentration in Alzheimer's Disease: Performance of a High-Throughput Amyloid Assay in Distinguishing Alzheimer's Disease Cases from Controls. *J Alzheimer's Dis* (2020) **74**:1285–1294. doi:10.3233/JAD-200046
61. Gao H, Liu M, Zhao Z, Yang C, Zhu L, Cai Y, Yang Y, Hu Z. Diagnosis of Mild Cognitive Impairment and Alzheimer's Disease by the Plasma and Serum Amyloid-beta 42 Assay through Highly Sensitive Peptoid Nanosheet Sensor. *ACS Appl Mater Interfaces* (2020) **12**:9693–9700. doi:10.1021/acsami.0c00370
62. Janelidze S, Mattsson N, Palmqvist S, Smith R, Beach TG, Serrano GE, Chai X, Proctor NK, Eichenlaub U, Zetterberg H, et al. Plasma P-tau181 in Alzheimer's disease: relationship to other biomarkers, differential diagnosis, neuropathology and longitudinal progression to Alzheimer's dementia. *Nat Med* (2020) **26**:379–386. doi:10.1038/s41591-020-0755-1
63. Karikari TK, Pascoal TA, Ashton NJ, Janelidze S, Benedet AL, Rodriguez JL, Chamoun M, Savard M, Kang MS, Therriault J, et al. Blood phosphorylated tau 181 as a biomarker for Alzheimer's disease: a diagnostic performance and prediction modelling study using data from four prospective cohorts. *Lancet Neurol* (2020) **19**:422–433. doi:10.1016/S1474-4422(20)30071-5
64. Palmqvist S, Janelidze S, Quiroz YT, Zetterberg H, Lopera F, Stomrud E, Su Y, Chen Y, Serrano GE, Leuzy A, et al. Discriminative Accuracy of Plasma Phospho-tau217 for Alzheimer Disease vs Other Neurodegenerative Disorders. *JAMA* (2020) **324**:772–781. doi:10.1001/JAMA.2020.12134

65. Perrotte M, Haddad M, Le Page A, Frost EH, Fulöp T, Ramassamy C. Profile of pathogenic proteins in total circulating extracellular vesicles in mild cognitive impairment and during the progression of Alzheimer's disease. *Neurobiol Aging* (2020) **86**:102–111. doi:10.1016/j.neurobiolaging.2019.10.010
66. Nam E, Lee Y-B, Moon C, Chang K-A. Serum Tau Proteins as Potential Biomarkers for the Assessment of Alzheimer's Disease Progression. *Int J Mol Sci* (2020) **21**:5007. doi:10.3390/ijms21145007
67. Sheu JJ, Yang LY, Sanotra MR, Wang S Te, Lu HT, Kam RSY, Hsu IU, Kao SH, Lee CK, Shieh JCC, et al. Reduction of AHI1 in the serum of Taiwanese with probable Alzheimer's disease. *Clin Biochem* (2020) **76**:24–30. doi:10.1016/j.clinbiochem.2019.11.011
68. Stockmann J, Verberk IMW, Timmesfeld N, Denz R, Budde B, Lange-Leifhelm J, Scheltens P, van der Flier WM, Nabers A, Teunissen CE, et al. Amyloid- $\beta$  misfolding as a plasma biomarker indicates risk for future clinical Alzheimer's disease in individuals with subjective cognitive decline. *Alzheimers Res Ther* (2020) **12**:169. doi:10.1186/s13195-020-00738-8
69. Teuber-Hanselmann S, Rekowski J, Vogelgsang J, Von Arnim C, Reetz K, Stang A, Jöckel KH, Wiltfang J, Esselmann H, Otto M, et al. CSF and blood kallikrein-8: A promising early biomarker for Alzheimer's disease. *J Neurol Neurosurg Psychiatry* (2020) **91**:40–48. doi:10.1136/jnnp-2019-321073
70. Verberk IMW, Thijssen E, Koelewijn J, Mauroo K, Vanbrabant J, de Wilde A, Zwan MD, Verfaillie SCJ, Ossenkoppele R, Barkhof F, et al. Combination of plasma amyloid beta(1-42/1-40) and glial fibrillary acidic protein strongly associates with cerebral amyloid pathology. *Alzheimers Res Ther* (2020) **12**:118. doi:10.1186/s13195-020-00682-7
71. Wang X, Zimmermann HR, Lockhart SN, Craft S, Ma T. Decreased Levels of Blood AMPK $\alpha$ 1 but not AMPK $\alpha$ 2 Isoform in Patients with Mild Cognitive Impairment and Alzheimer's Disease: A Pilot Study. *J Alzheimer's Dis* (2020) **76**:217–224. doi:10.3233/JAD-191189
72. Westwood S, Baird AL, Anand SN, Nevado-Holgado AJ, Kormilitzin A, Shi L, Hye A, Ashton NJ, Morgan AR, Bos I, et al. Validation of Plasma Proteomic Biomarkers Relating to Brain Amyloid Burden in the EMIF-Alzheimer's Disease Multimodal Biomarker Discovery Cohort. *J Alzheimer's Dis* (2020) **74**:213–225. doi:10.3233/JAD-190434
73. Youn YC, Lee BS, Kim GJ, Ryu JS, Lim K, Lee R, Suh J, Park YH, Pyun J-M, Ryu N, et al. Blood Amyloid- $\beta$  Oligomerization as a Biomarker of Alzheimer's Disease: A Blinded Validation Study. *J Alzheimer's Dis* (2020) **75**:493–499. doi:10.3233/jad-200061
74. Jia L, Zhu M, Kong C, Pang Y, Zhang H, Qiu Q, Wei C, Tang Y, Wang Q, Li Y, et al. Blood neuro-exosomal synaptic proteins predict Alzheimer's disease at the asymptomatic stage. *Alzheimer's Dement* (2021) **17**:49–60. doi:10.1002/alz.12166
